# Supplementary material
Source: publisher site journal article supplement (https://www.dovepress.com/article/302852)
Supplement: Supplementary file 1 [file get_supplementary_file.php]

**Table S1. The actual drug substance names and distributions among the three groups**

| **Group** | **Regimen** | **Name of antibiotic** | **No.** |
| --- | --- | --- | --- |
| **Group A** | Non-antipseudomonal β-lactam monotherapy | Amoxicillin/sulbactam | 5 |
| Ceftriaxone | 41 |
| Cefotaxime | 21 |
| Cefmetazole | 7 |
| Ceftizoxime | 9 |
| Cefoxitin | 51 |
| Cefminox | 36 |
| Latamoxef | 10 |
| Antipseudomonal β-lactam monotherapy | Piperacillin | 3 |
| Piperacillin /tazobactam | 29 |
| Mezlocillin /sulbactam | 21 |
| Cefoperazone | 5 |
| Cefoperazone /Sulbactam | 12 |
| Ceftazidime | 10 |
| Cefepime | 7 |
| Cefpiramide | 1 |
| Carbapenems monotherapy | Meropenem | 12 |
| Imipenem / cilastatin | 4 |
| Biapenem | 6 |
| **Group B** | Fluoroquinolone monotherapy | Moxifloxacin | 52 |
| Levofloxacin | 93 |
| Ciprofloxacin | 1 |
| **Group C** | Azithromycin +Non-antipseudomonal β-lactam | Amoxicillin/sulbactam | 6 |
| Ceftriaxone | 7 |
| Cefmetazole | 5 |
| Ceftizoxime | 3 |
| Cefoxitin | 29 |
| Cefminox | 9 |
| Azithromycin +Antipseudomonal β-lactam | Piperacillin /tazobactam | 5 |
| Cefoperazone /Sulbactam | 3 |
| Ceftazidime | 2 |
| Azithromycin +Carbapenems | Meropenem | 1 |
| Imipenem / cilastatin | 1 |
| Biapenem | 2 |
